# Supplementary material for: Effects of dietary physical or nutritional factors on morphology of rumen papillae and transcriptome changes in lactating dairy cows based on three different forage-based diets
Source: PubMed Central journal article supplement (PMC5420399; doi:10.1186/s12864-017-3726-2), 2017-05-06

# COMPLEMENT AND COAGULATION CASCADES

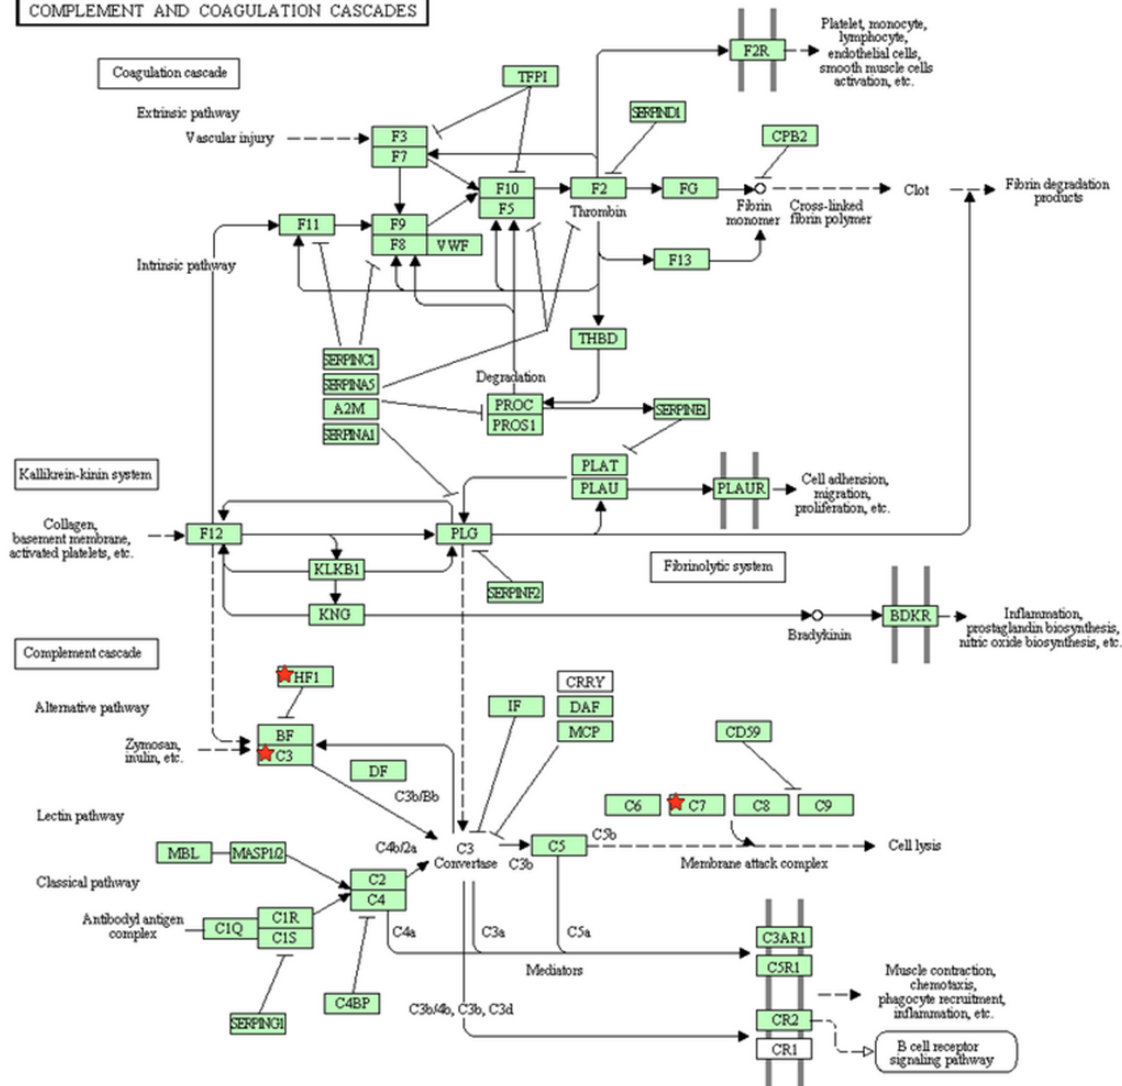

Supplement: 12864_2017_3726_MOESM3_ESM.pdf [file 12864_2017_3726_MOESM3_ESM.pdf]
